# Supplementary material
Source: publisher figshare collection journal article supplement (https://gsajournals.figshare.com/ndownloader/files/15041075)

Supplementary Fig. S4. PCR-based validation of putative Z- and W-linked ddRAD markers in two-individual test panel of known-sex *Cryptobranchus* from Missouri. M = C36AM, F = C38AF, \* = candidate retained for ten-individual panel.

(A) Candidate loci 1-9.

|               |   |   |   |   |   |   |   |   |   |   |   |   |   |   |   |   |    |    |        |
|---------------|---|---|---|---|---|---|---|---|---|---|---|---|---|---|---|---|----|----|--------|
| <u>Locus:</u> | 1 | 1 | 2 | 2 | 3 | 3 | 4 | 4 | 5 | 5 | 6 | 6 | 7 | 7 | 8 | 8 | 9* | 9* | Ladder |
| <u>Sex:</u>   | M | F | M | F | M | F | M | F | M | F | M | F | M | F | M | F | M  | F  |        |

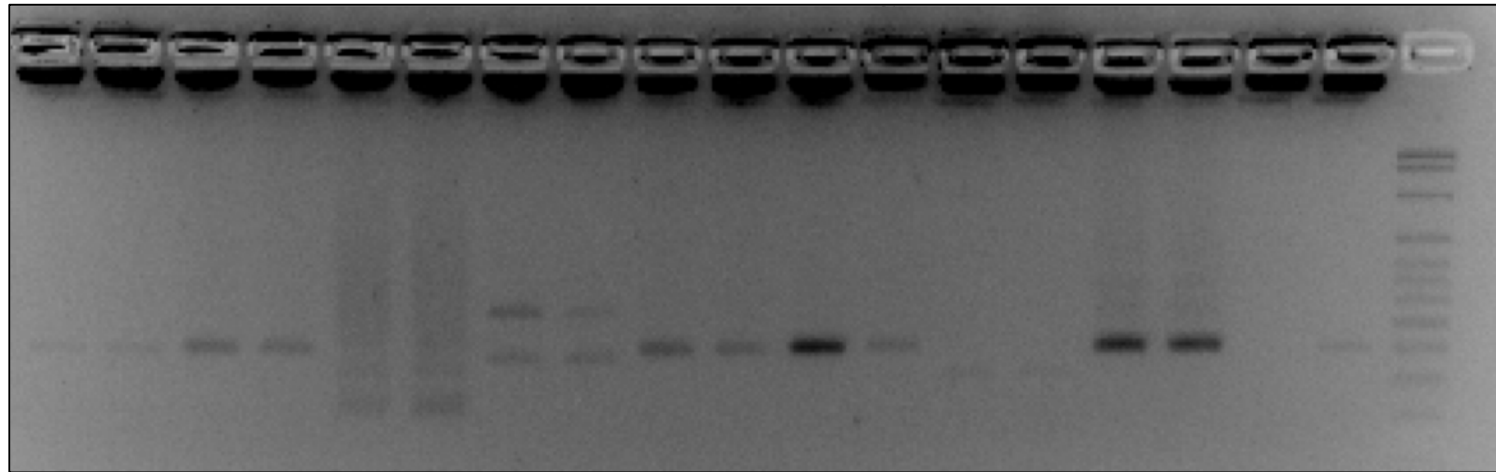

Supplementary Fig. S4. PCR-based validation of putative Z- and W-linked ddRAD markers in two-individual test panel of known-sex *Cryptobranchus* from Missouri. M = C36AM, F = C38AF, \* = candidate retained for ten-individual panel.

(B) Candidate loci 10-12.

|               |     |     |    |    |     |     |        |
|---------------|-----|-----|----|----|-----|-----|--------|
| <u>Locus:</u> | 10* | 10* | 11 | 11 | 12* | 12* | Ladder |
| <u>Sex:</u>   | M   | F   | M  | F  | M   | F   |        |

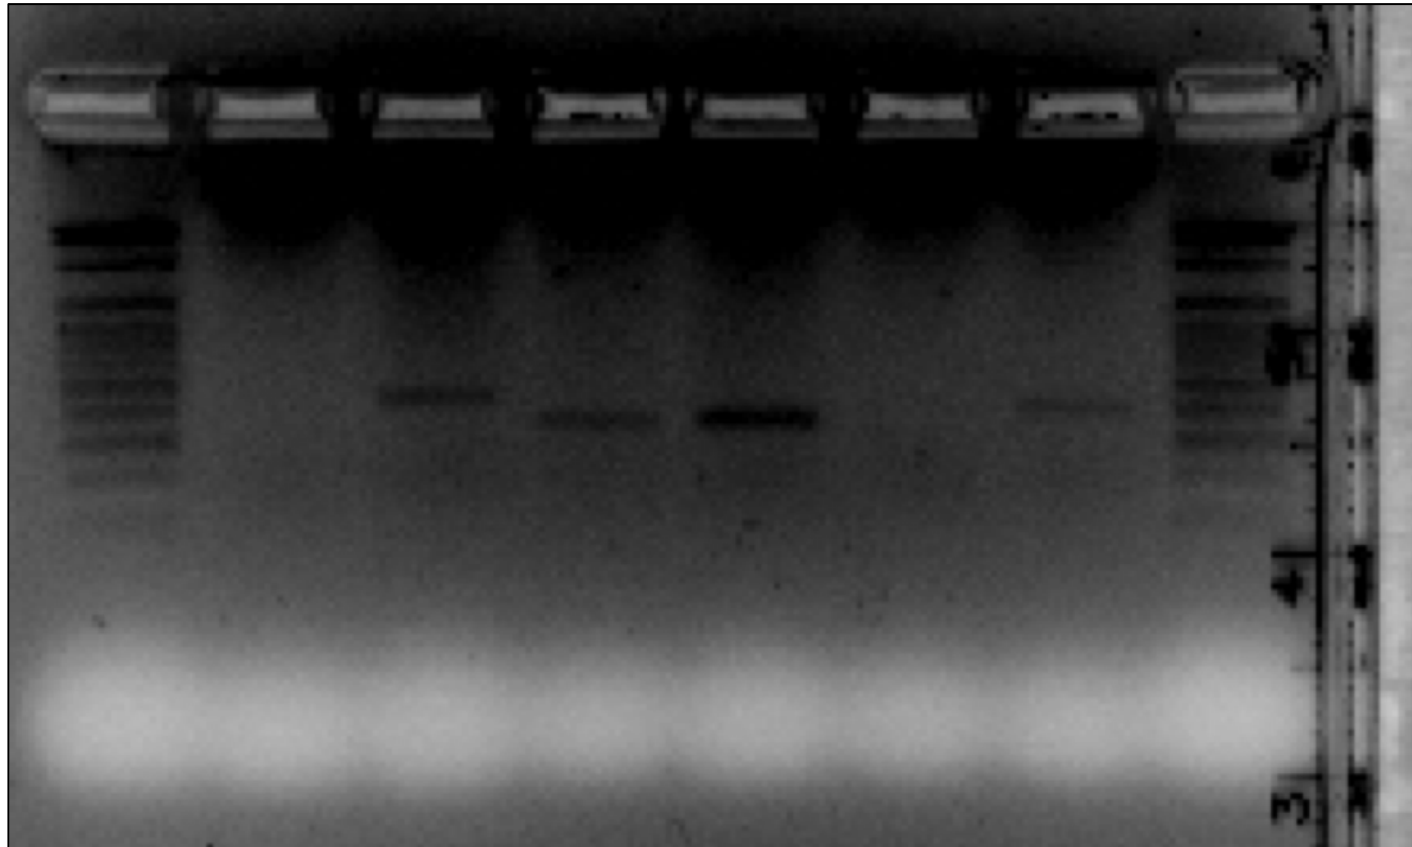

Supplementary Fig. S4. PCR-based validation of putative Z- and W-linked ddRAD markers in two-individual test panel of known-sex *Cryptobranchus* from Missouri. M = C36AM, F = C38AF, \* = candidate retained for ten-individual panel.

(C) Candidate loci 13-19.

|               |        |    |    |     |     |    |    |     |     |    |    |    |    |     |     |
|---------------|--------|----|----|-----|-----|----|----|-----|-----|----|----|----|----|-----|-----|
| <u>Locus:</u> | Ladder | 13 | 13 | 14* | 14* | 15 | 15 | 16* | 16* | 17 | 17 | 18 | 18 | 19* | 19* |
| <u>Sex:</u>   |        | M  | F  | M   | F   | M  | F  | M   | F   | M  | F  | M  | F  | M   | F   |

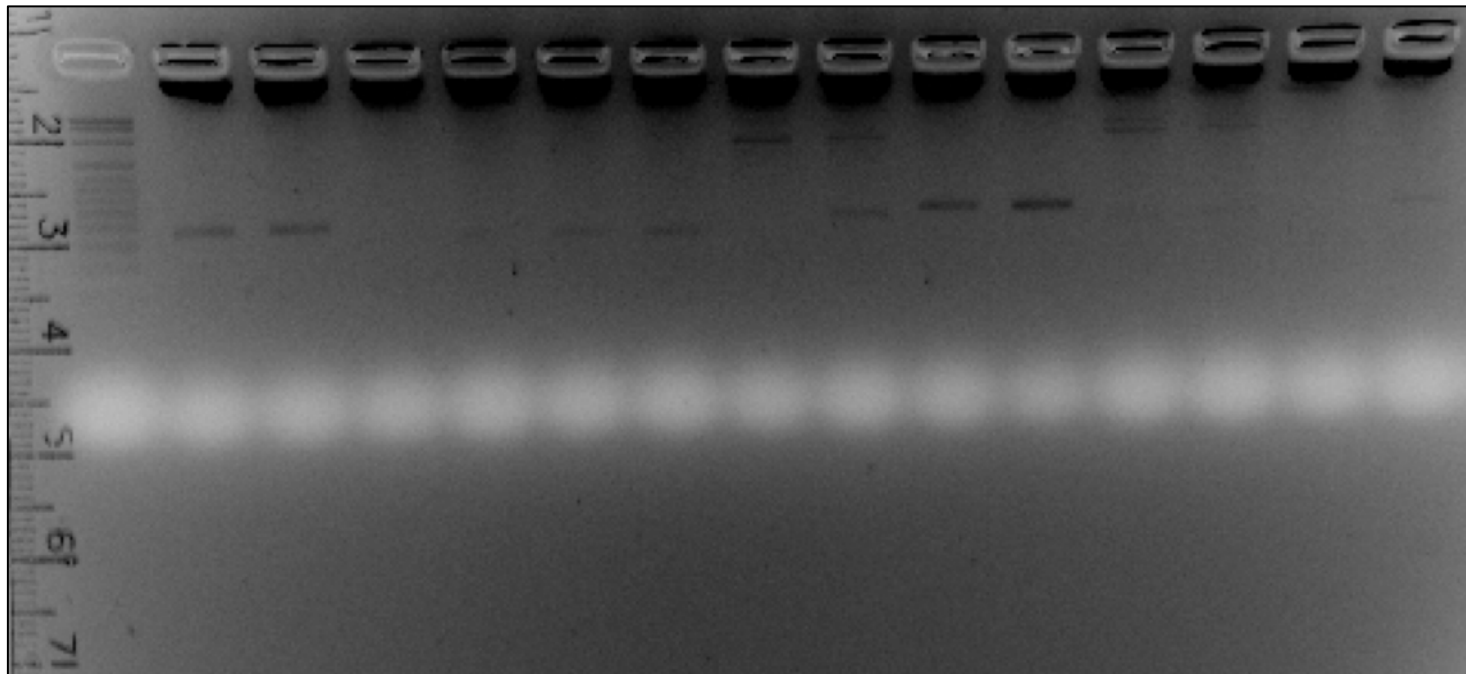

Supplementary Fig. S4. PCR-based validation of putative Z- and W-linked ddRAD markers in two-individual test panel of known-sex *Cryptobranchus* from Missouri. M = C36AM, F = C38AF, \* = candidate retained for ten-individual panel.

(D) Candidate loci 20-24.

|               |    |    |    |    |    |    |     |     |    |    |        |
|---------------|----|----|----|----|----|----|-----|-----|----|----|--------|
| <u>Locus:</u> | 20 | 20 | 21 | 21 | 22 | 22 | 23* | 23* | 24 | 24 | Ladder |
| <u>Sex:</u>   | M  | F  | M  | F  | M  | F  | M   | F   | M  | F  |        |

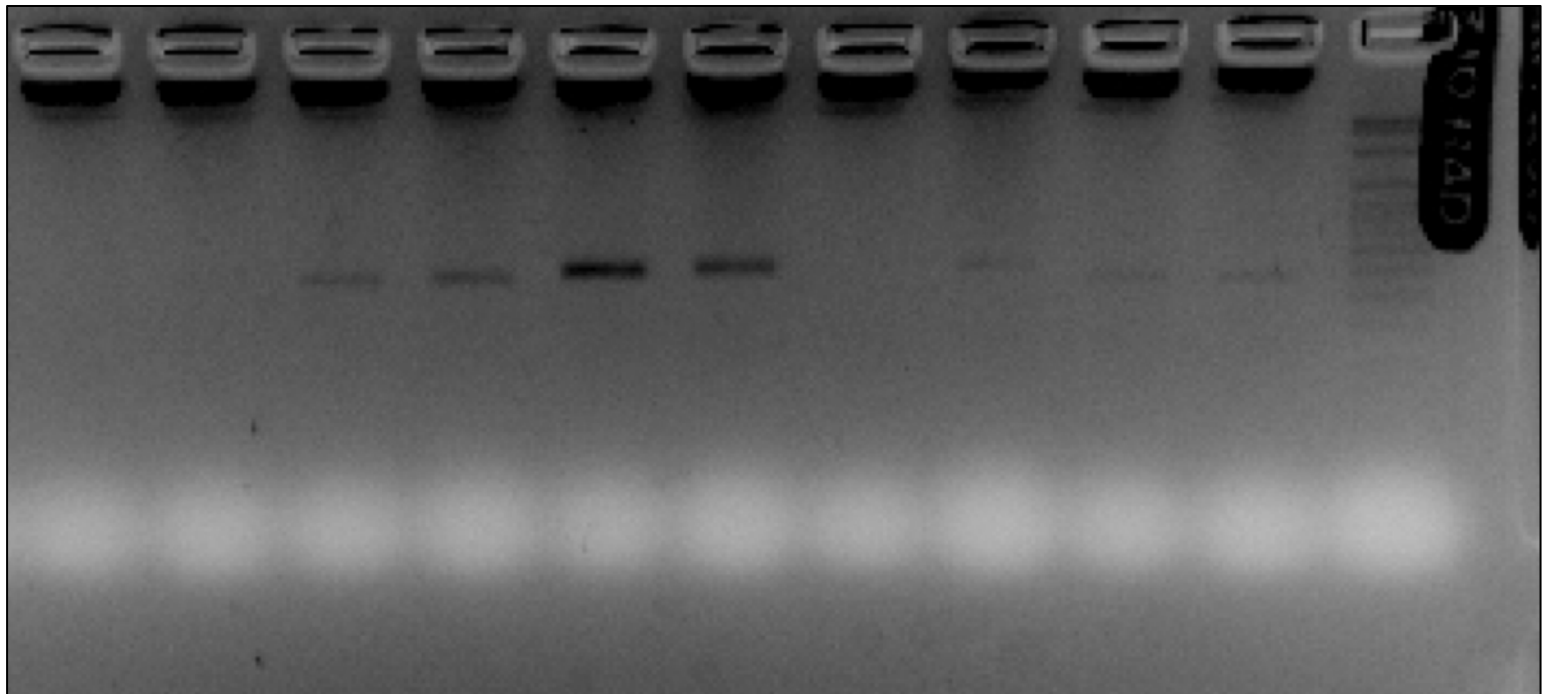

Supplementary Fig. S4. PCR-based validation of putative Z- and W-linked ddRAD markers in two-individual test panel of known-sex *Cryptobranchus* from Missouri. M = C36AM, F = C38AF, \* = candidate retained for ten-individual panel.

(E) Candidate loci 25-27.

|               |        |    |    |    |    |    |    |
|---------------|--------|----|----|----|----|----|----|
| <u>Locus:</u> | Ladder | 25 | 25 | 26 | 26 | 27 | 27 |
| <u>Sex:</u>   |        | M  | F  | M  | F  | M  | F  |

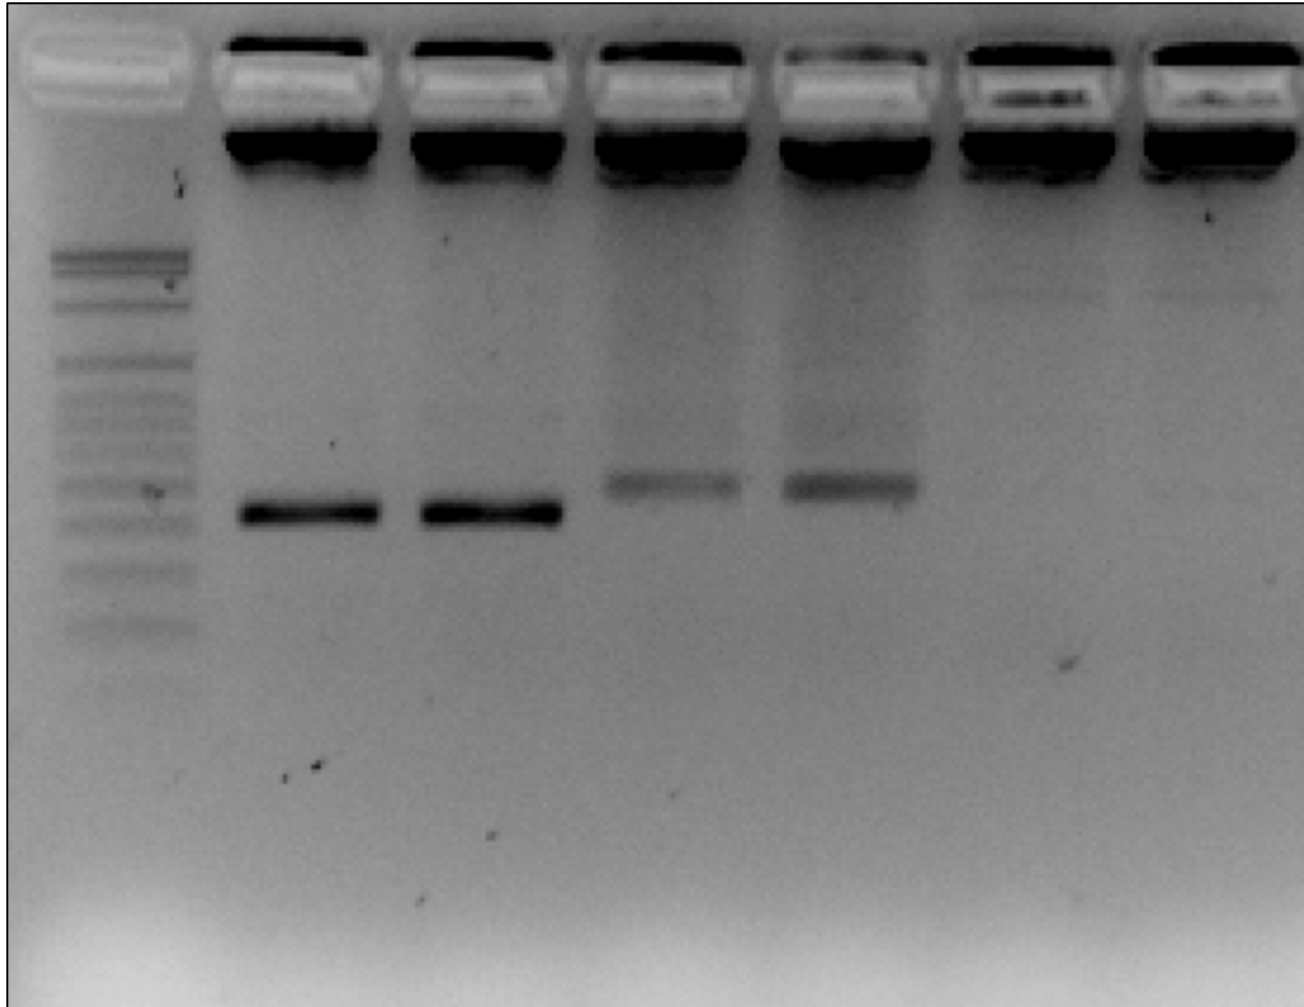

Supplementary Fig. S4. PCR-based validation of putative Z- and W-linked ddRAD markers in two-individual test panel of known-sex *Cryptobranchus* from Missouri. M = C36AM, F = C38AF, \* = candidate retained for ten-individual panel.

(F) Candidate loci 28-36.

|               |    |    |    |    |    |    |    |    |     |     |    |    |     |     |    |    |    |    |        |
|---------------|----|----|----|----|----|----|----|----|-----|-----|----|----|-----|-----|----|----|----|----|--------|
| <u>Locus:</u> | 28 | 28 | 29 | 29 | 30 | 30 | 31 | 31 | 32* | 32* | 33 | 33 | 34* | 34* | 35 | 35 | 36 | 36 | Ladder |
| <u>Sex:</u>   | M  | F  | M  | F  | M  | F  | M  | F  | M   | F   | M  | F  | M   | F   | M  | F  | M  | F  |        |

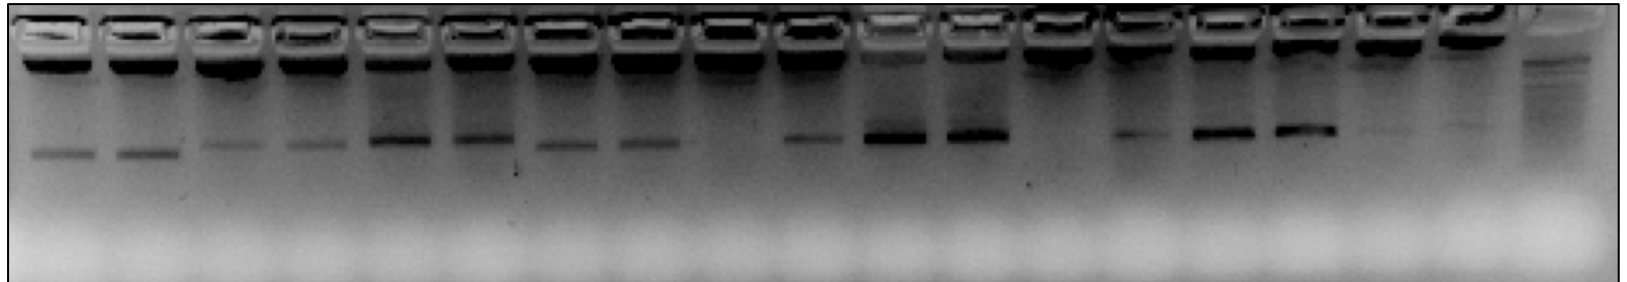

Supplementary Fig. S4. PCR-based validation of putative Z- and W-linked ddRAD markers in two-individual test panel of known-sex *Cryptobranchus* from Missouri. M = C36AM, F = C38AF, \* = candidate retained for ten-individual panel.

(G) Candidate loci 37-43 and 18S positive control.

|               |        |    |    |     |     |     |     |    |    |    |    |    |    |     |     |     |     |     |     |        |
|---------------|--------|----|----|-----|-----|-----|-----|----|----|----|----|----|----|-----|-----|-----|-----|-----|-----|--------|
| <u>Locus:</u> | Ladder | 37 | 37 | 38* | 38* | 39* | 39* | 40 | 40 | 41 | 41 | 42 | 42 | 43* | 43* | N/A | N/A | 18S | 18S | Ladder |
| <u>Sex:</u>   | M      | F  | M  | F   | M   | F   | M   | F  | M  | F  | M  | F  | M  | F   | M   | F   | M   | F   |     |        |

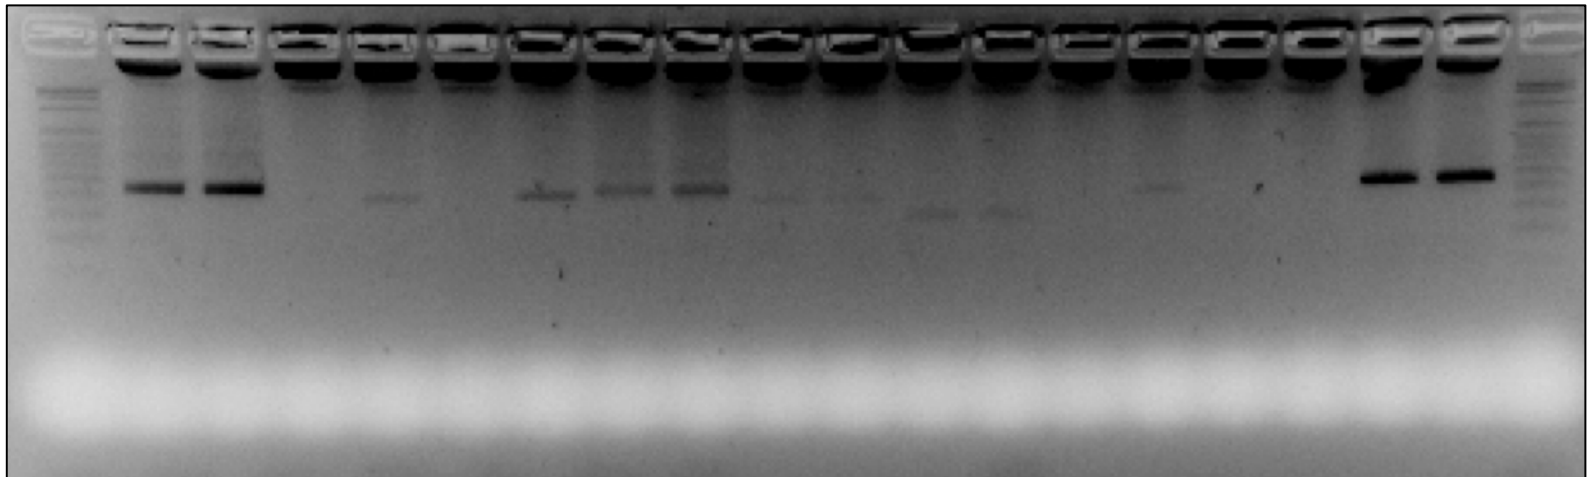

Supplement: Supplementary file 1 [file 15041075]
